# Supplementary material for: Prediction of protective sensory loss, neuropathy and foot ulceration in type 2 diabetes
Source: PubMed Central journal article supplement — BMJ Open Diabetes Res Care. 2016 May 5;4(1):e000163. doi: 10.1136/bmjdrc-2015-000163 (PMC4873950; doi:10.1136/bmjdrc-2015-000163), 2016-05-05
Supplement: bmjdrc-2015-000163supp_table1.pdf [file bmjdrc-2015-000163supp_table1.pdf]

| Weight MF grams             | Total | 2      | 2       | 4      | 4       | 6      | 6       | 8      | 8       |
|-----------------------------|-------|--------|---------|--------|---------|--------|---------|--------|---------|
| Test status                 | -     | 1 lost | >1 lost |
| DM number                   | 168   | 8      | 138     | 18     | 87      | 12     | 69      | 11     | 46      |
| DM % loss                   | -     | 4.7    | 82      | 10.7   | 52      | 7.1    | 41      | 6.5    | 11.3    |
| Non DM Number               | 56    | 5      | 23      | 10     | 6       | 3      | 4       | 2      | 1       |
| Non DM % loss               | -     | 9      | 41      | 7      | 10      | 5      | 7       | 3.5    | 1.8     |
| Chi Square DM versus non DM | -     | NS     | P<0.01  | NS     | P<0.01  | NS     | P<0.01  | NS     | P<0.01  |

**Supplementary Table 1** Baseline graded monofilament results in diabetic and non-diabetic comparator groups. Patients with loss of 10 gram perception at baseline excluded.
