# Supplementary material for: Prediction of protective sensory loss, neuropathy and foot ulceration in type 2 diabetes
Source: PubMed Central journal article supplement — BMJ Open Diabetes Res Care. 2016 May 5;4(1):e000163. doi: 10.1136/bmjdrc-2015-000163 (PMC4873950; doi:10.1136/bmjdrc-2015-000163), 2016-05-05
Supplement: bmjdrc-2015-000163supp_table2.pdf [file bmjdrc-2015-000163supp_table2.pdf]

| Patient | Age         | Social circumstances | Living alone | Date of ulcer |
|---------|-------------|----------------------|--------------|---------------|
| 1       | elderly     | Married              | No           | 2008          |
| 2       | elderly     | Married              | No           | 2002          |
| 3       | middle aged | Married              | No           | 2006          |
| 4       | middle aged | Married              | No           | 2003          |
| 5       | elderly     | Married              | No           | 2007          |
| 6       | elderly     | Divorced             | Yes          | 2010          |
| 7       | middle aged | Married              | No           | 2008          |
| 8       | middle aged | Married              | No           | 2001          |
| 9       | middle aged | Divorced             | Yes          | 2008          |

**Supplementary Table 2**

**Details of 9 type 2 diabetic foot ulcer patients during 7 years follow up  
4 were female. Elderly  $\geq 70$ ; middle aged 40 to 70 years.**
