# Supplementary material for: Prediction of protective sensory loss, neuropathy and foot ulceration in type 2 diabetes
Source: PubMed Central journal article supplement — BMJ Open Diabetes Res Care. 2016 May 5;4(1):e000163. doi: 10.1136/bmjdrc-2015-000163 (PMC4873950; doi:10.1136/bmjdrc-2015-000163), 2016-05-05
Supplement: bmjdrc-2015-000163supp_table3.pdf [file bmjdrc-2015-000163supp_table3.pdf]

| Patient | Age         | Date of death  | Cause of death  | Foot ulceration |
|---------|-------------|----------------|-----------------|-----------------|
| 1       | middle aged | Left area 2007 | Not Known       | Not known       |
| 2       | elderly     | 2001           | Stroke          | No              |
| 3       | middle aged | 2007           | Cardiac failure | Charcot         |
| 4       | middle aged | 2009           | COPD            | No              |
| 5       | elderly     | Left area 2004 | Not known       | Not known       |

**Supplementary Table 3: Details of deceased baseline neuropathy patients lost to follow up. Three were female. Elderly  $\geq 70$ ; middle aged as 40 to 70 years.**
