# Supplementary material for: Prediction of protective sensory loss, neuropathy and foot ulceration in type 2 diabetes
Source: PubMed Central journal article supplement — BMJ Open Diabetes Res Care. 2016 May 5;4(1):e000163. doi: 10.1136/bmjdrc-2015-000163 (PMC4873950; doi:10.1136/bmjdrc-2015-000163), 2016-05-05
Supplement: bmjdrc-2015-000163supp_table4.pdf [file bmjdrc-2015-000163supp_table4.pdf]

| Patient | Age years   | Diabetes Duration Months | Baseline missed 10gram MF | Follow up 10 gram MF | Baseline R VPT V | Follow up R VPT V | Baseline L VPT | Follow up L VPT | Baseline Symptoms | Follow up Symptoms |
|---------|-------------|--------------------------|---------------------------|----------------------|------------------|-------------------|----------------|-----------------|-------------------|--------------------|
| 1       | elderly     | 144                      | 5                         | 0                    | 18.3             | 14                | 27.6           | 11.5            | NO                | NO                 |
| 2       | elderly     | 108                      | 4                         | 2                    | 41               | 15                | 45.3           | 11              | NO                | NO                 |
| 3       | middle aged | 420                      | 3                         | 0                    | 19               | 21.2              | 20             | 20.8            | YES               | NO                 |
| 4       | middle aged | 36                       | 4                         | 0                    | 23.8             | 26                | 22             | 21.5            | NO                | NO                 |
| 5       | middle aged | 120                      | 5                         | 1                    | 30.6             | 13.3              | 47.8           | 36.3            | NO                | NO                 |
| 6       | elderly     | 157                      | 6                         | 0                    | 16.3             | 10                | 16             | 9.8             | NO                | NO                 |
| 7       | middle aged | 72                       | 5                         | 0                    | 39               | 25                | 31.1           | 15              | NO                | NO                 |
| Mean    | 66.3        | 151.0                    | -                         | -                    | 26.9             | 17.8              | 30.0           | 18.0            | -                 | -                  |
| SD      | 5.3         | 125.6                    | -                         | -                    | 10.1             | 6.2               | 12.4           | 9.3             | -                 | -                  |

**Supplementary Table 4:**

**Details of 7 patients with baseline neuropathy who remitted after 7 years follow up. Three were female. Elderly  $\geq 70$ ; middle aged as 40 to 70 years.**
